# Supplementary material for: A Retrospective Study of Diaphragmatic Breathing Training Combined with Discharge Care Bundles in Patients with Chronic Obstructive Pulmonary Disease
Source: Hindawi journal article supplement (doi:10.1155/2022/9649986), 2022-09-14
Supplement: f1 [file 9649986.f1.docx]

**Supplementary Table 1** Explanations of abbreviations in this study

| Abbreviations | Explanations |
| --- | --- |
| COPD | Chronic obstructive pulmonary disease |
| DBT | Diaphragmatic breathing training |
| BCKQ | Bristol COPD Knowledge Questionnaire |
| HADS | Hospital Anxiety and Depression Scale |
| CAT | COPD Assessment Test |
| SGRQ | St. George’s Respiratory Questionnaire |
| GOLD | Global Initiative for Chronic Obstructive Lung Disease |
| HRQOL | Health-related quality of life |
| FEV1 | Forced expiratory volume in one second |
| FVC | Forced vital capacity |
| 6MWD | 6-min walk distance |
